## Plant uses in a traditional fisherman community in northeastern Brazil

Tng DYP<sup>1,2</sup>, Apgaua DMG<sup>1,2</sup>, Lisboa MDS<sup>1</sup>, El-Hani, CN<sup>1</sup>

<sup>1</sup>Instituto de Biologia, Universidade Federal da Bahia, National Institute of Science & Technology in Interdisciplinary and Transdisciplinary Studies in Ecology and Evolution (INCT IN-TREE), Brazil. R. Barão Jeremoabo, Ondina, 40170-115 Salvador, Bahia, Brazil

<sup>2</sup>Centre for Tropical, Environmental and Sustainability Sciences, College of Science and Engineering, James Cook University, 14-88 McGregor Rd, Smithfield, Queensland 4878, Australia

### **Abstract**

*Background:* Knowledge of traditional plant use in rural communities is under threat from urbanization and also land use change. Hence, elucidating region-specific patterns traditional knowledge of habitat resource use is crucial for assisting policy making with regard to nature conservation, human nutrition, and human health. Using original data from northeast Bahia, Brazil, we aim to document the collective knowledge of plant use possessed by artisanal fishermen and women in fishing communities, related to medicinal, construction, technology and ritualistic/religious uses.

*Methods:* Data were collected through interviews with and opportunistic guided tours by local specialists to record the local knowledge of plant use and methods of use.

*Results:* Through interviews, 116 species of plants from 104 genera and 47 botanical families were identified along with their local names, plant parts utilized, habitats, and preparation methods, and an additional 26 spp. for which only local names were available. Of these, 72 spp. are used as medicine, 48 spp. as non-conventional edibles, 31 spp. for construction and 11 for religious/mystical purposes. Female informants generally cited more food and medicinal plants than male informants. All interviewees unanimously expressed that the use of plants for medicines and fishing technology has significantly reduced or been superseded by modern materials.

*Conclusion:* The present study demonstrates that the rich collective plant use knowledge of an artisanal fishing community in northeast Brazil. The results of this study serves as a framework for to extend ethnobotanical investigations to other traditional fishing communities in the vicinity, and also to examine more social and demographic factors influencing traditional knowledge related to uses of plants. Finally, the rich tradition of plant use in the region underpins the need to encourage measures to preserve this cultural knowledge and conserve the natural environments that are a source of these plants.

Keywords: artisanal fishermen, Bahia, northeast Brazil, traditional plant knowledge

## INTRODUCTION

Throughout history, wherever humans have settled into communities they have been faced with the necessity of developing strategies for managing and using natural resources to meet their daily needs. The unique cultural heritage within any given traditional community is thus comprised in part by the culmination of knowledge of the local environmental and the practices associated with uses of natural plant, animal and geological resources. However, the erosion of culture in traditional communities worldwide is occurring at an alarming and unprecedented rate due to modernization (Benz et al. 2000; Tang & Gavin 2016) and also by the development of tourism (Briassoulis & van der Straaten 2013; Canavan 2016; Xue et al. 2017).

In terms of biodiversity conservation, several authors have expounded on the importance of conserving ethnobotanical knowledge as part of living cultural knowledge and practice between communities and the environment for biodiversity conservation (Maroyi 2011). Research on local knowledge also confirm the value of these cultures and self-sufficiency of local communities, as well as the importance of biodiversity to the sustainability of these populations (di Stasi et al. 2002).

Communities that occupy areas close to natural vegetation such as tropical forests coexist with great biological diversity, and possess a cultural repertoire of practices related to the uses of plants in everyday life (de Santana et al. 2016; Sujarwo et al. 2016). In Brazil, these communities include indigenous ethnic people, Quilombolas (descendants of Afro-Brazilian runaway slaves) and various traditional communities of fishermen, river-dwellers, rubber sap gatherers, etc, who often live in well-delineated communities in rural areas away from major cities and surrounded by natural landscapes.

Medicinal plants play a hugely important role in the well-being of these rural communities, and to improve the use of the Brazilian biodiversity and public access to herbal medicines the Brazilian government has encouraged the use of medicinal plants and herbal medicines (Brasil 2006). Indeed, among the various categories of traditional plant uses, the use of medicinal plants is by far the most well studied. In Northeastern Brazil for instance, there have been various ethnobotanical studies focused on medicinal plant use in various traditional communities (Alberquerque et al. 2008; Borges & Bautista 2010; Cartaxo et al. 2010; Cunha et al. 2012; da Silva et al. 2012; Gomes & Bandeira 2012; de Araújo et al. 2018). In spite of these surveys, the geographical coverage of studies on plant use in traditional communities is still far from complete. For instance, there are still very little studies on communities in the littoral northeast of Bahia, where traditional communities that practice artisanal fishing still have a rather well preserved culture.

As a corollary to medicinal plant use, ethnic indigenous communities often have systems of religious or ritual plant use for healing or for restoring well-being (Bussman & Sharon 2006) the use of which is poorly documented in the region (Almeida et al. 2014). In these instances, there are members of the community who serve in the capacity of shamans or spiritual healers who help cure ailments through ritual use of plants (). By comparison, such practices are less well known in traditional communities (Rodrigues & Carlini 2006), but at the same little has been documented about any ritual use of plants in such communities.

Additionally, other aspects of plant use deserving attention include the use of non-conventional plant foods, here broadly defined as wild, wayside, or naturalized plants that can supplement the nutrition of people in rural communities (Barminas et al. 1998; Kebu & Fassil 2006). Interest in non-conventional plant foods in Brazil have increased in recent years (Kinupp & Lorenzi 2014; do Nascimento et al. 2015) but this aspect of traditional plant use remains poorly studied in most regions in Brazil.

Perhaps one of the most poorly documented aspect of traditional plant uses are those used for construction, tool making and technology. This may be particularly relevant for traditional communities who rely on fishing as the main source of sustenance, as fishermen would have utilized plant resources to construct boats, and other structures and tools involved in their fishing technology. Focusing on a traditional fishing community in the northeast of Brazil, we take a holistic approach in our objective to document traditional knowledge of plants for medicine, food, construction and religious use. As gender has been widely studied as a potential driver of plant knowledge (Torres-Avilez et al. 2016), we also compare the patterns of plant knowledge held by male and females in the community, with the hypothesis that there will be a divergence in male and female knowledge about plant use.

## MATERIAL AND METHOD

### *Study area and historical context*

The study was conducted in Siribinha (11°48'49"S, 37°36'38"W), an artisanal fishing community with a population of ~400 located in proximity to the mouth of the Itapicuru river on the north coast of the State of Bahia, Brazil. This community is within the Municipality of Conde, and has an economy driven primarily by tourism, coconut plantations, fishing, and the cattle farming.

The village of Conde was part of the Portuguese occupation north of Salvador, which began in 1549 with the first cattle corrals around the present city. Between 1558 and 1572, Jesuit missionaries arrived to the area where Conde is today, interacting with the indigenous Tupinambás indigenous people who occupied the region. In 1621, Portuguese settlers started to raise livestock and sugarcane and tobacco crops with slave labor, and in 1806, Conde became an area of litigation between the states of Bahia and Sergipe. By 1935, Conde was formally recognized as a municipality within the state of Bahia, with headquarters in the town of Ribeira do Conde.

The natural vegetation of the area consists of freshwater alluvial wetlands, mangroves, beach vegetation, shrubby thicket-like forests (locally-known as *restingas*) growing on sand dunes, and remnant patches of closed forest (Atlantic forest). Coconut plantations and cattle ranches also make up part of the land use tenure of the municipality.

Part of the territory of Conde is located within the Environmental Protection Area of the North Coast (<http://www.oads.org.br/leis/2724.pdf>), but this has not prevented socio-environmental problems such as deforestation and disorderly appropriation of territory which threatens the cultural heritage of the municipality and ecological integrity of surrounding natural habitats (e.g., Limonad 2007). In particular, residents in several coastal settlements in the Municipality of Conde face socio-economical problems of

limited employment and income opportunities, leading to an exodus of the younger generation to larger cities, and thereby contributing to the erosion of traditional culture.

#### *Interviews and random walks with traditional experts*

The study was conducted between August 2018 to February 2019. During this period, we made door-to door visits in order to identify local people with a specialized knowledge of plant use (Davis and Wagner 2003). Therefore, our sampling approach was intentionally non-random (Albuquerque et al. 2014a), under the assumption that local specialists would provide more specific and higher quality information concerning medicinal plants. During our first contacts with the communities the inhabitants themselves identified specialists, who we define as "individuals recognized by the community as having deep knowledge about the traditional uses of native and/or introduced plants". Using the snowball method (Bailey 1994), names of other specialists were then obtained. Eventually, we interviewed a total of 21 local specialists (11 females and 10 males in Siribinha) were eventually interviewed, with ages ranging from 43-82. All the local specialists identified had lived in the community for at least 30 years, and were frequently sought out by other community members for advice on plant use. The men are currently active or retired fishermen, and the women consisted of home-makers who sometimes fished or specialized in collecting crabs (*marisqueiras*). One of the female local specialist interviewed was also regarded in the community as a "rezeira", or one who prays or bestows blessings.

We used semi-structured interviews (Albuquerque et al. 2014b), which best suited the preferences of the community inhabitants. All interviews were conducted in Brazilian Portuguese, and specialists were interviewed individually as recommended by Phillips and Gentry (1993), to ensure that responses were independent. As was appropriate for the moment, during the course of interviews some traditional experts brought us on guided tours (Albuquerque et al. 2014b) through their gardens or through the natural vegetation in the vicinity of their houses to describe the plants they use. Our questionnaires gathered information about the medicinal, food, construction and ritual uses of plants, plant names, plant parts used, and preparation methods where relevant.

As our aim was to evaluate how community members use plants into 12 categories: medicine, food, for implement-making for fishing practices or domestic use, construction, and ritual use, following modified categories of Prance et al. (1987). For the category of plants used as non-conventional food, we consider only species collected from the surrounding environments or planted in gardens to supplement conventional food. This includes non-conventional plant food species following the definition of Kinupp & Lorenzi (2014), and native or naturalized fruits harvested from surrounding habitats (Lorenzi et al. 2015). We also distinguished the lifeforms of the plants cited (tree, shrub, herb and climber).

Plants were identified in the field or where identification was not possible, a sample was brought back to the lab and identified at the herbarium at the Federal University of Bahia, using the literature (Lorenzi & Matos 2002) or through consultations with experts. Voucher specimens of all collected samples were lodged at the Laboratory of Teaching, Philosophy and History of Biology at the Federal University of Bahia. Plants were classified in terms of their origin as native (native to Brazil), or non-native and

naturalized based on the online flora of Brasil ([floradobrasil.jbrj.gov.br/2012/](http://floradobrasil.jbrj.gov.br/2012/)), and the cultivated status of each species was noted.

### Data analysis

The first step in our data analysis was to calculate two indices related to plant use, the use value (UV) and the informant consensus factor (ICF). The UV demonstrates the relative importance of each species known locally, which we calculated following the formula:  $UV = U/N$ , where U refers to the number of citations per species, and N refers to the number of traditional experts interviewed (Gürdal and Kültür 2013). The ICF denotes the degree to which traditional experts exchange information about plant use, which we calculated using the following formula:  $ICF = N_{ur} - N_t / N_{ur} - 1$ , where  $N_{ur}$  refers to the number of use citations in each category and  $N_t$  is the number of species indicated in each category (Cartaxo et al. 2010). Therefore, ICF values will be low (approaching 0) if plants are chosen randomly, or if traditional experts do not exchange information about their use, but high (approaching 1) if information is exchanged between them. For the ICF index, all citations were placed into 12 plant use, distribution type or lifeform categories: medicine, food in general, non-conventional food plants, construction and technology in general, fishing-related technology only, ritual and mystical plant use, native, non-native, tree, shrub, herb, and climber.

With the 21 traditional experts, we tested the difference in the number of plants cited by male and female traditional experts using a student's t-test ( $\alpha = 0.05$ ). We also identified major gradients in plant use knowledge using non-metric multidimensional scaling (NMDS) ordination, using a Jaccard distance matrix. For this analysis we included all 142 cited plants, and performed Spearman-rank correlations for each species with each NMDS axis to examine the main species driving patterns in the ordination.

## RESULTS

We recorded 116 species belonging to 104 genera and 47 families (Table 1). The identities of an additional 26 cited plant records could not be ascertained and only local names are presented (Table 1). The top five botanical families with the most number of species with cited uses were the Fabaceae (14 spp.), Arecaceae, Lamiaceae and Myrtaceae (7 spp. each) and the Anacardiaceae (6 spp.) (Table 1). Plants with the highest Use Values (UV) were *Rhizophora mangle* and *Anacardium officinale* (both  $UV = 0.52$ ), *Cocos nucifera* and *Myrciaria floribunda* (both  $UV = 0.48$ ), and *Manilkara salzmanii* (both  $UV = 0.43$ ).

Medicine and food plants comprised the highest number of citations (72 and 69 spp. respectively), and among the food category, 48 spp. may be considered non-conventional plant food. For general construction and technology, traditional experts cited 31 spp., among which 25 spp. were cited for fishing technology. Plants used in religious or mystical contexts numbered at 11 spp. A number of species featured in multiple use categories (Fig. 2a), with the highest number of plants shared between the food and medicine categories (21 spp.).

In general, we found high information consensus values (ICF) within all categories of plant use, distribution type and lifeform (all  $ICF \geq 0.65$ ), with the highest ICF values documented in plants used for religious or mystical purposes (Table 2). Female



traditional experts in general cited on average more plants (24.7 spp.) than male traditional experts (15.9 spp.), although this was not significant. However, female traditional experts cited significantly more medicinal plants, food plants, non-native species and plants from the herb lifeform than males.

In corroboration, male and female traditional experts appeared to have different combinations of plant knowledge, with female traditional experts citing a group of five species used variously for food or home grown remedies which were not cited by males, while males cited a species used for construction that were not cited by females (Fig. 2b). Age of the traditional experts did not have a significant bearing on the number of plants each traditional experts cited (Linear regression,  $R^2 = 0.02$ ,  $p = 0.53$ ).

### *Medicinal plant use*

The most widely reported plants used for medicine were *Cymbopogon citratus*, *Dysphania ambrosioides*, *Lippia alba* (Fig. 3a), *Pimpinella anisum*, and *Plectranthus neochilus*. Of the 72 species of plants used for medicinal purposes, 42 species or 58% are commonly cultivated in home gardens for use. However, a number of plants native to the surrounding forest and sand dune vegetation are also collected for medicinal purposes, namely *Aristolochia labiata*, *Chrysobalanus icaco* (Fig. 3b), *Periandra mediterranea*, and *Schinus terebinthifolius*, and *Stemodia foliosa*.

The most common method of medicinal plant use within the community is by the preparation of teas from leaves, stems or roots (Table 1). A number of plants are also made into juices or into syrups in conjunction with other ingredients. An interesting mode of using a medicinal plant, *Hancornia speciosa*, involved stirring the raw leaf sap into water and drinking the concoction. Some plants are also processed into a paste and applied topically to wounds (e.g. *Dysphania ambrosioides*), or shoots boiled in water and used for bathing (e.g. *Anacardium occidentale* and *Schinus terebinthifolius*) or for washing wounds.

### *Uses of non-conventional edible plants and other non-conventional plant foods*

The utilization of seasonal bush fruits from the surrounding forests and *restinga* shrublands continues to be widely practiced, and traditional experts report the harvesting the fruits and nuts of the native palms (primarily *Allagoptera brevicalyx*, *Bactris* spp., and *Syagrus* spp.), cashew nut tree (*Anacardium occidentale*) and also the fruits of various members of the Annonaceae, Cactaceae (Fig. 3c), Clusiaceae, Myrtaceae, Polygonaceae, and Sapotaceae (Table 1).

However certain specific uses of some species are no longer practiced, such as the extraction of milk from the inner flesh of *Syagrus* spp. and *Allagoptera brevicalyx* fruits.

### *Plants used for general construction, fishing technology and daily-use implements*

The wood of *Rhizophora mangle* was the primary species used for house making in the past (Table 1), although most homes in the community are now made of concrete. Other species of trees were also used in construction or to fortify the structure of houses (e.g. *Laguncularia racemosa*, *Hymenolobium excelsum*, etc.) (Table 1).

A number tree species was cited as being used for fishing technology. Fishing canoes were made using wood of tree species such as *Artocarpus heterophyllus*, *Dalbergia nigra*, *Erythrina velutina*, etc., although *A. heterophyllus* is held in high esteem for this purpose. The leaf stalks of palm species *Attalea funifera*, *Cocos nucifera*, and *Elaeis guineensis* were also sought-after for making hatch for houses, and also boat shelters (Fig. 4a). Additionally, *Attalea funifera*, and *Elaeis guineensis* are used to make artisanal fishing fences (*camboas*) and crab traps (*covos*) (Figure 4b). These leaf stalks were processed into strips, shaped and bound by cordage obtained from plants such as *Davilla flexuosa*. Another notable example of fishing technology includes the use of *L. racemosa* branches beaten against the crab traps, which is believed to exude a scent attract crabs.

Before nylon nets were widely available, the community relied on plant fibres to weave nets. Of the respondents interviewed, many mentioned the use of the leaf stalks of the native palm *Bactris setosa* (Arecaceae). The women collected the leaves and did the initial processing (beating the leaf stalks to obtain the fibres), while the men hand-wove nets using a spool. The process of net-making was labour intensive, and is a process that has been discontinued in favor of widely available nylon nets. Additional fishing implements constructed from locally-sourced plant material included needles for net mending (Figure 4c), for which the wood of *Tocoyena bullata* was used.

Palm leaves were also historically used to transport of fish out of the community to regional markets, whereby fishermen wove the leaflets of the *Syagurus* spp. or *Cocos nucifera* palm fronds through the flesh of the fish to secure them onto carrying poles. Other uses of palm fibre included the use of *Attalea funifera* leaf stalk fibres to make broom heads (Fig. 4d).

#### *Plants used in spiritual and religious purposes and the role of faith*

The catholic and evangelic denomination of Christianity are the main religions practiced within the community, and the community role of a “blesser” or *rezadeiro* is designated to a person who blesses or prays for members of the community upon request. *Rezeiros* used to play a prominent role in the community as the person consulted for blessings and faith healing, but this practice is now restricted to the older generation. A number of plants were listed as being used specifically in praying or bestowing blessings, namely *Dieffenbachia* spp., *Jatropha gossypifolia* (Fig. 3d), *Scoparia dulcis*, and *Senna occidentalis*. However, according to a *rezadeira* (female *rezadeiro*) we interviewed, the words used are more important than the plants, and she says that any plant will suffice.

Importance is also attributed to the number of branches used in blessing. For bestowing blessings or prayers, the *rezadeira* we interviewed collects three branches and she performs the prayer six times over the recipient, after which she recites another prayer to discard the branches. In such prayers, the negative energies that cause sickness in a person are believed to be transferred to the leaves or branches that are discarded.

Some community elders emphasized also the importance of faith in healing, and attributes huge importance to the recipients of healing having faith in the healing. However, one elderly male traditional expert elaborated on certain ritual practices in his

use of medicinal plants whereby branches picked for making tea are collected in odd numbers, principally three or five branches, but never six.

## Discussion

Globally, cultural knowledge of rural communities is under threat from urbanization, and it is therefore critical to register and understanding patterns of this cultural knowledge for future generations. Studying artisanal fishing communities in the littoral north region of Bahia, northeast Brazil, we found a diverse cultural knowledge of plant use for medicinal, construction, technological and ritual purposes. It is clear also that the women of the community in general harbor more plant knowledge than the males.

### *The broader context of medicinal plant use*

The medicinal plants used by the communities fit within belong a broader regional milieu of medicinal plant knowledge (di Stasi et al. 2002; Lorenzi & Matos 2002), and the domestic cultivation of the most commonly cited species *Anacardium occidentale*, *Cymbopogon citratus*, *Dysphania ambrosioides*, and *Lippia alba* (Fig. 3a) have variously been reported for other indigenous Indian communities in the region (Alberquerque et al. 2009; Borges & Bautista 2010; Cunha et al. 2012) and afro-brazilian (Quilombola) communities (Gomes and Bandeira 2012; Mota and Dias 2016; Lisboa et al. 2017) and rural communities (Almeida et al. 2014; Bandeira et al. 2015). Many of the species cited are also available commercially in regional markets within the state (de Araújo et al. 2018; pers obs). Likewise, the use of various species of *Ocimum* as reported in this study has also been previously documented in the region (de Holanda and de Albuquerque 1998)

However, some members of the communities are also stewards of knowledge regarding medicinal plants in the natural vegetation in the area. The use of *Anacardium occidentale* and *Schinus terebinthifolia* for skin problems and female genitourinary disorders are in line with recent reports for other riverine fishermen communities in the region (Paiva et al. 2017). Other notable examples are the wild harvested *Chrysobalanus icaco* (Fig. 3b) and *Periandra mediterranea*.

The common names applied to medicinal plants deserve special mention. In one particular instant, we came across a common name, *acamfo*, applied to *Periandra mediterranea*, for which could not find references to in the literature. Previously, other workers had reported the use of this plant under the names *acançu* (Almeida et al. 2010), *arcancuz* (da Silva et al. 2012), *alcacuz* and *alcancuz* (Gomes et al. 2012) from various other localities inland in the state. This site specific differences in names may reflect phonetic changes in a local name being applied to a single plant, as people from communities move from place to place. Semantic differences in common names can sometimes also reflect taxonomic differences, such as in the case of the genus *Passiflora* (Neto 2008). On the other hand, some local names refer to different species depending on region. In our study region, *carqueja* is applied to *Borreria verticillata* (Rubiaceae), but south in the state of Minas Gerais, *carqueja* refers to species of *Baccharis* (Asteraceae). In both regions, the respective *carqueja* species are used for treating stomach problems (Lorenzi and Matos 2008), reflecting a convergence in use.



The local specialists likely acquired a broad knowledge of medicinal plants by way of experimentation and trading information with relatives or people from the surrounding communities. This appears to be supported by the high informant consensus factor that we obtained for the medicinal plant category. Yet it is also of note that many plants listed by community specialists are herbaceous or naturalized plants, a pattern that has been noted by Voeks (1996).

#### *Food plants*

As with medicinal plant use, the use of plants for consumption as food fit into the two categories of cultivated for domestic use and wild harvested (Fig. 3c), and some of the species overlap with plants used for medicine. The knowledge on the use of wild plants appear to be passed on to the younger generation, and children from the community continue to harvest seasonal fruits for consumption (Fig 3d; pers. ob.), and this is important avenue of follow up research. Various of the plants used have also been reported for other communities in the Bahia state (Rodrigues and Guedes 2006; Agra et al. 2008; Neto et al. 2014; do Nascimento et al. 2015; Mota and Dias 2016).

#### *Plants for construction and technological purposes*

The plants used for construction and technology have been documented by various workers to be used in the region. For instance, leaves and fibres of palms such as *Attalaea funifera*, *Bactris* spp. and *Syagrus* spp. feature prominently in traditional use in the region (Lorenzi et al. 2000), and the use of mangrove wood to construct houses was a matter of convenience for communities living near mangrove environments (Bezerra 2008). However, in the present, wood material for construction of houses and particularly boats are largely sourced from eucalypt plantations, and cordage have largely been replaced by commercial nylon.

Canoes were previously constructed using a single trunk, but later wood planks were used. Wood used for the construction of canoes presents a divergence from previous literature (Andrade et al. 2016). Among the species cited in Andrade et al. (2016) the current study only had *Artocarpus heterophyllus* in common.

It is interesting to note that in other ethnobotanical studies on other littoral communities, the use of species for constructing fishing technology was not mentioned (Lopes et al. 2013).

#### *Religious and mystical use of plants*

We describe for the first time specific details and attitudes relating to religious and ritualistic practices involving the use of plants in blessing and prayers. Notably, most of the plants listed under this purpose are naturalized or cultivated, with the exception of *Protium heptaphyllum* and *Schinus terebinthifolius*, and the species cited accord with those reported by other authors (Varella 1973; de Oliveira et al. 2009). Although members of the communities are predominantly Christian, the influences of the syncretic African Candomblé and Umbanda religions is conspicuous, particularly in the use of *Jatropha gossypifolia* (Varella 1973; Pires et al. 2009).

#### *The maintenance or erosion of traditional knowledge*

Although the majority of plant medicinal uses is well documented, there was a consensus among the local specialists that this knowledge is undergoing a progressive dilution with the proceeding generations. Nevertheless, we still know little about the degree of knowledge transfer across age groups within the community, as we only interviewed traditional experts aged 43 and above.

The paradigm of loss of cultural knowledge or that succeeding generations have less knowledge due to globalization has been challenged on at least one count by Vandebroek and Balick (2012), who studied people who use plants to self-medicate in the Dominican Republic. Indeed, informal interactions with children in the community gave us the impression that the younger generation do have some traditional knowledge about food and medicinal plant uses, and more formal interviews with people of all age groups in the community would be a worth follow up study.

More critically, the landscape change in the region has meant that certain forests where medicinal plants used to be collected have now been felled. As has been reported from other communities in the state of Bahia, the process of modernization, particularly increasing access to formal education and availability of modern pharmaceuticals, may lead to traditional domains of medical knowledge being increasingly perceived as an irrelevant province of past generations (Voeks & Leony 2004). Indeed, environmental degradation and large changes in modern social and economic systems are well known to be drivers leading to a reduction in traditional medicinal plant use (Anyinam 1995; Srithi et al. 2009). While we do not quantitative figures, it surfaced during interviews with some of the traditional experts that certain medicinal plants used to be collected from some forests that are no longer extant.

The substitution of artificial material used in fishing technology is probably one of the more prominent observations made during the study. As far as we could ascertain from informal queries and observations, there are no longer any nets made of plant material due to the availability of more durable nylon thread, and the knowledge of how to process the plant fibres to make such nets are only known by the elderly generation. To preserve this aspect of artisanal knowledge, videos are being recorded of how fishermen used to make nets, and also museum artifacts are being gathered.

## **Conclusion**

The registration of a rich tradition of plant use by a fishing community is surprising, and underpins an urgent need to conserve traditional knowledge in the region. Educational programs for elementary school students involving the dissemination of this body of knowledge traditional plant use knowledge are in the works, with hopes that the next generation will become custodians of their cultural knowledge. Further studies are needed to document plant use of other traditional communities within the river system.

## **Acknowledgements**

We thank Domingos Cardoso and Maria Lenise Silva Guedes for help with identifying some specimens. We thank also the member of the communities who participated in interviews. The study was supported by a INCT grant awarded to Charbel El-Hani.

## **References**

Agra, M. D. F., Silva, K. N., Basílio, I. J. L. D., Freitas, P. F. D., & Barbosa-Filho, J. M. (2008). Survey of medicinal plants used in the region Northeast of Brazil. *Revista Brasileira de Farmacognosia* 18, 472-508.

Albuquerque, U. P., da Silva, V. A., Cabral, M. D. C., Alencar, N. L., & Cavalcanti Andrade, L. D. H. (2008). Comparisons between the use of medicinal plants in indigenous and rural caatinga (dryland) communities in NE Brazil. *Boletín Latinoamericano y del Caribe de Plantas medicinales y Aromáticas* 7, 156-170.

Albuquerque, U. P., de Lucena, R. F. P., & Neto, E. M. D. F. L. (2014a). Selection of research participants. In *Methods and techniques in ethnobiology and ethnoecology* (pp. 1-13). Humana Press, New York, NY.

Albuquerque, U. P., Ramos, M. A., de Lucena, R. F. P., & Alencar, N. L. (2014b). Methods and techniques used to collect ethnobiological data. In *Methods and techniques in Ethnobiology and Ethnoecology* (pp. 15-37). Humana Press, New York, NY.

Almeida, M. Z., Léda, P. H., da Silva, M. Q., Pinto, A., Lisboa, M., Guedes, M. L. M., & Peixoto, A. L. (2014). Species with medicinal and mystical-religious uses in São Francisco do Conde, Bahia, Brazil: a contribution to the selection of species for introduction into the local Unified Health System. *Revista Brasileira de Farmacognosia* 24, 171-184.

Almeida, V. S., & Bandeira, F. P. S. F. (2010). O significado cultural do uso de plantas da caatinga pelos quilombolas do Raso da Catarina, município de Jeremoabo, Bahia, Brasil. *Rodriguesia* 61, 195-209.

Andrade, I. M. M., Lucena, E. A. M. R., Chiapetti, J., Pereira, R. C. A., & Mielke, M. S. (2016). Espécies arbóreas utilizadas por pescadores para a construção de jangadas, Área de Proteção Ambiental Costa de Itacaré-Serra Grande, Bahia, Brasil. *Rodriguesia* 67, 45-53.

Bailey, K. (1994). *Methods of social research*, 4th edn. The Free Press, New York.

Barminas, J. T., Charles, M., & Emmanuel, D. (1998). Mineral composition of non-conventional leafy vegetables. *Plant Foods for Human Nutrition* 53, 29-36.

Benz, B. F., Cevallos, J., Santana, F., Rosales, J., & Graf, S. (2000). Losing knowledge about plant use in the Sierra de Manantlan biosphere reserve, Mexico. *Economic Botany* 54, 183-191.

Bezerra, F. J. (2008). O bosque de mangues e a pesca artesanal no Distrito de Acupe (Santo Amaro, Bahia): uma abordagem etnoecológica. *Acta Scientiarum. Biological Sciences* 30, 275-282.

Borges, K. N., & Bautista, H. (2010). Etnobotânica de plantas medicinais na comunidade de Cordoaria, litoral norte do estado da Bahia, Brasil. *PLURAIIS-Revista Multidisciplinar* 1, 153-174.

- Briassoulis, H., & Van Der Straaten, J. (Eds.). (2013). *Tourism and the environment: regional, economic, cultural and policy issues* (Vol. 6). Springer Science & Business Media.
- Bussmann, R. W., & Sharon, D. (2006). Traditional medicinal plant use in Northern Peru: tracking two thousand years of healing culture. *Journal of Ethnobiology and Ethnomedicine* 2, 47.
- Canavan, B. (2016). Tourism culture: Nexus, characteristics, context and sustainability. *Tourism Management* 53, 229-243.
- Cartaxo, S.L., Souza, M.M.A., Albuquerque, U.P., 2010. Medicinal plants with bioprospecting potential used in semi-arid northeastern Brazil. *Journal of Ethnopharmacology* 131, 326–342
- Cunha, S. T., Rodrigues, E. D., Alves, C., Merrigan, T. L., Melo, T., Guedes, M. L. S., ... & Toralles, M. B. (2012). The use of medicinal plants by an indigenous Pataxó community in NE Brazil. *Revista Brasileira de Plantas Mediciniais* 14, 84-91.
- Da Silva, N. B., Del Fino, A., Esquibel, M., Santos, J., & de Almeida, M. (2012). Uso de plantas medicinais na comunidade quilombola da Barra II–Bahia, Brasil. *Boletín Latinoamericano y del Caribe de Plantas Medicinales y Aromáticas* 11, 435-453.
- Davis, A., Wagner J. R. (2003). Who Knows? On the Importance of Identifying "experts" when researching local ecological knowledge. *Human Ecology* 31, 463-489.
- de Araújo, G. S., de Brito, N. M., de Oliveira, V. J. D. S., & dos Santos, E. B. (2018). Plantas nmedicinais comercializadas no município de Muritiba–Bahia. *Journal of Biology & Pharmacy and Agricultural Management* 14, 10-24.
- de Oliveira, É. C. S., & Trovão, D. M. D. B. M. (2009). O uso de plantas em rituais de rezas e benzeduras: um olhar sobre esta prática no estado da Paraíba. *Revista brasileira de Biociências* 7, 245-251.
- de Holanda, C. A. L., & de Albuquerque, U. P. (1998). Etnobotánica del género *Ocimum* L. (Lamiaceae) en las comuidades afrobrasileñas. *Anales del Jardín Botánico de Madrid* 56, 107-118.
- de Santana, B. F., Voeks, R. A., & Funch, L. S. (2016). Ethnomedicinal survey of a maroon community in Brazil's Atlantic tropical forest. *Journal of Ethnopharmacology* 181, 37-49.
- di Stasi, L.C., Oliveira, G.P., Carvalhaes, M.A., Queiroz-Junior, M., Tien, O.S., Kakinami, S.H., Reis, M.S., 2002. Medicinal plants popularly used in the Brazilian tropical Atlantic forest. *Fitoterapia* 73, 69–91.
- do Nascimento, V. T., de Carvalho Pereira, H., Silva, A. S., Nunes, A. T., & de Medeiros, P. M. (2015). Plantas alimentícias espontâneas conhecidas pelos moradores do Vau da Boa Esperança, município de Barreiras, oeste da Bahia, nordeste do Brasil. *Revista Ouricuri* 5, 86-109.

- Gomes, T. B., & Bandeira, F. P. S. F. (2012). Uso e diversidade de plantas medicinais em uma comunidade quilombola no Raso da Catarina, Bahia. *Acta Botanica Brasilica* 26, 796-809.
- Gürdal, B., & Kültür, Ş., (2013). An ethnobotanical study of medicinal plants in Marmaris (Muğla, Turkey). *Journal of Ethnopharmacology* 146, 113–126.
- Kebu, B., & K. Fassil, 2006. Ethnobotanical study of wild edible plants in Derashe and Kucha Districts. South Ethiopia. *Journal of Ethnobiology and Ethnomedecine* 2, 53.
- Kinupp, V. F., & Lorenzi, H. (2014). Plantas Alimentícias Não Convencionais (PANC) no Brasil: guia de identificação, aspectos nutricionais e receitas ilustradas. Instituto Plantarum de Estudos da Flora Ltda.
- Limonad, E. (2007). O fio da meada. Desafios ao planejamento e à preservação ambiental na Costa dos Coqueiros (Bahia). <http://www.ub.edu/geocrit/9porto/esterlim.htm>, accessed on 06/20/2017
- Lisboa, M. D. S., Pinto, A. S., Barreto, P. A., Ramos, Y. J., Silva, M. Q., Caputo, M. C., & Almeida, M. Z. D. (2017). Estudo etnobotânico em comunidade quilombola Salamina/Putumujú em Maragogipe, Bahia. *Revista Fitos* 11, 48-61.
- Lopes, L. C. M., & Lobão, A. Q. (2013). Etnobotânica em uma comunidade de pescadores artesanais no litoral norte do Espírito Santo, Brasil. *Boletim do Museu de Biologia Mello Leitão* 32, 29-52.
- Lorenzi, H., & Matos, F. J. A. (2008). Plantas medicinais no Brasil: nativas e exóticas. 2nd Ed. Nova Odessa: Instituto Plantarum, 544pp.
- Lorenzi, H., Souza, H. M. de, Costa, J. T. de M., Cerqueira, L. S. C. de, Ferreira, E., (2000). Palmeiras brasileiras e exóticas cultivadas. Instituto Plantarum de Estudos da Flora, Nova Odessa, Brasil, 432pp.
- Lorenzi, H., Lacerda, M. T. C., & Bacher, L. B. (2015). Frutas no Brasil. Instituto Plantarum de Estudos da Flora Ltda. São Paulo. Brazil.
- Maroyi, A., (2011). An ethnobotanical survey of medicinal plants used by the people in Nhema communal area, Zimbabwe. *Journal of Ethnopharmacology* 136, 347–354
- Mota, R. D. S., & Dias, H. M. (2016). Quilombolas e recursos florestais medicinais no sul da Bahia, Brasil. *Interações* 13, 152-159.
- Neto, E. C. (2008). Análise semântica dos nomes comuns atribuídos às espécies de *Passiflora* (Passifloraceae) no Estado da Bahia, Brasil. *Neotropical Biology and Conservation* 3, 86-94.
- Neto, F. R. G., Almeida, G. S. S. A., Jesus, N. G., & Fonseca, M. R. (2014). Estudo etnobotânico de plantas medicinais utilizadas pela Comunidade do Sisal no município de Catu, Bahia, Brasil. *Revista Brasileira de Plantas Medicinais* 16, 856-865.
- Paiva, K. O., Oliveira, G. L., Farias, D. F., & Muller, T. S. (2017). Plantas medicinais utilizadas em transtornos do sistema geniturinário por mulheres ribeirinhas, Caravelas, Bahia. *Revista Fitos* S1, 92-98. DOI 10.5935/2446-4775.20170019



- Phillips, O., & Gentry, A. H. (1993). The useful plants of Tambopata, Peru: I. Statistical hypotheses tests with a new quantitative technique. *Economic Botany* 47, 15-32
- Pires, M. V., Abreu, P. P., Soares, C. S., da Costa Silva, D., do Nascimento Souza, B., Mariano, D. M., & de Lucena, E. A. R. M. (2009). Etnobotânica de terreiros de candomblé nos municípios de Ilhéus e Itabuna, Bahia, Brasil. *Revista Brasileira de Biociências* 7, 3-8.
- Prance, G.T., Baleé, W., Boom, B. M., & Carneiro, R. L. (1987). Quantitative ethnobotany and the case for conservation in Amazonia. *Conservation Biology* 1, 296-310.
- Rodrigues, A. C. C., & Guedes, M. L. S. (2006). Utilização de plantas medicinais no Povoado Sapucaia, Cruz das Almas–Bahia. *Revista Brasileira de Plantas Mediciniais* 8, 1-7.
- Rodrigues, E., & Carlini, E. A. (2006). A comparison of plants utilized in ritual healing by two Brazilian cultures: Quilombolas and Kraho Indians. *Journal of Psychoactive Drugs* 38, 285-295.
- Silva, A. J. D. R., & Andrade, L. D. H. C. (2005). Etnobotânica nordestina: estudo comparativo da relação entre comunidades e vegetação na Zona do Litoral-Mata do Estado de Pernambuco, Brasil. *Acta Botanica Brasileira* 19, 45-60.
- Srithi, K., Balslev, H., Wangpakapattanawong, P., Srisanga, P., & Trisonthi, C. (2009). Medicinal plant knowledge and its erosion among the Mien (Yao) in northern Thailand. *Journal of Ethnopharmacology* 123, 335-342.
- Sujarwo, W., Arinasa, I. B. K., Caneva, G., & Guarrera, P. M. (2016). Traditional knowledge of wild and semi-wild edible plants used in Bali (Indonesia) to maintain biological and cultural diversity. *Plant Biosystems* 150, 971-976.
- Tang, R., & Gavin, M. C. (2016). A classification of threats to traditional ecological knowledge and conservation responses. *Conservation and Society* 14, 57-70.
- Torres-Avilez, W., Medeiros, P. M. D., & Albuquerque, U. P. (2016). Effect of gender on the knowledge of medicinal plants: systematic review and meta-analysis. *Evidence-Based Complementary and Alternative Medicine* 2016: 6592363. <http://dx.doi.org/10.1155/2016/6592363>
- Vandebroek, I., & Balick, M. J. (2012). Globalization and loss of plant knowledge: challenging the paradigm. *PloS One* 7, e37643.
- Varella, J. S. C. (1973). *Ervas Sagradas na Umbanda*. Rio de Janeiro: Editora Espiritualista. 154 p.
- Voeks, R. A. (1996). Tropical forest healers and habitat preference. *Economic Botany* 50, 381-400.
- Voeks, R. A., & Leony, A. (2004). Forgetting the forest: assessing medicinal plant erosion in eastern Brazil. *Economic Botany* 58, S294-S306.

Xue, L., Kerstetter, D., & Hunt, C. (2017). Tourism development and changing rural identity in China. *Annals of Tourism Research* 66, 170-182.

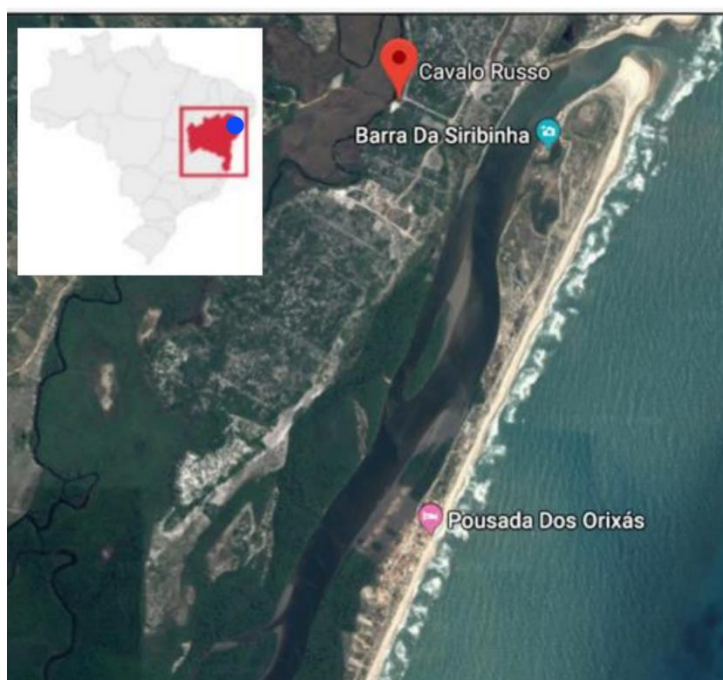

Fig. 1. Map showing the locality of the traditional fishermen community at Siribinha, Municipal of Conde, Bahia, Brazil.

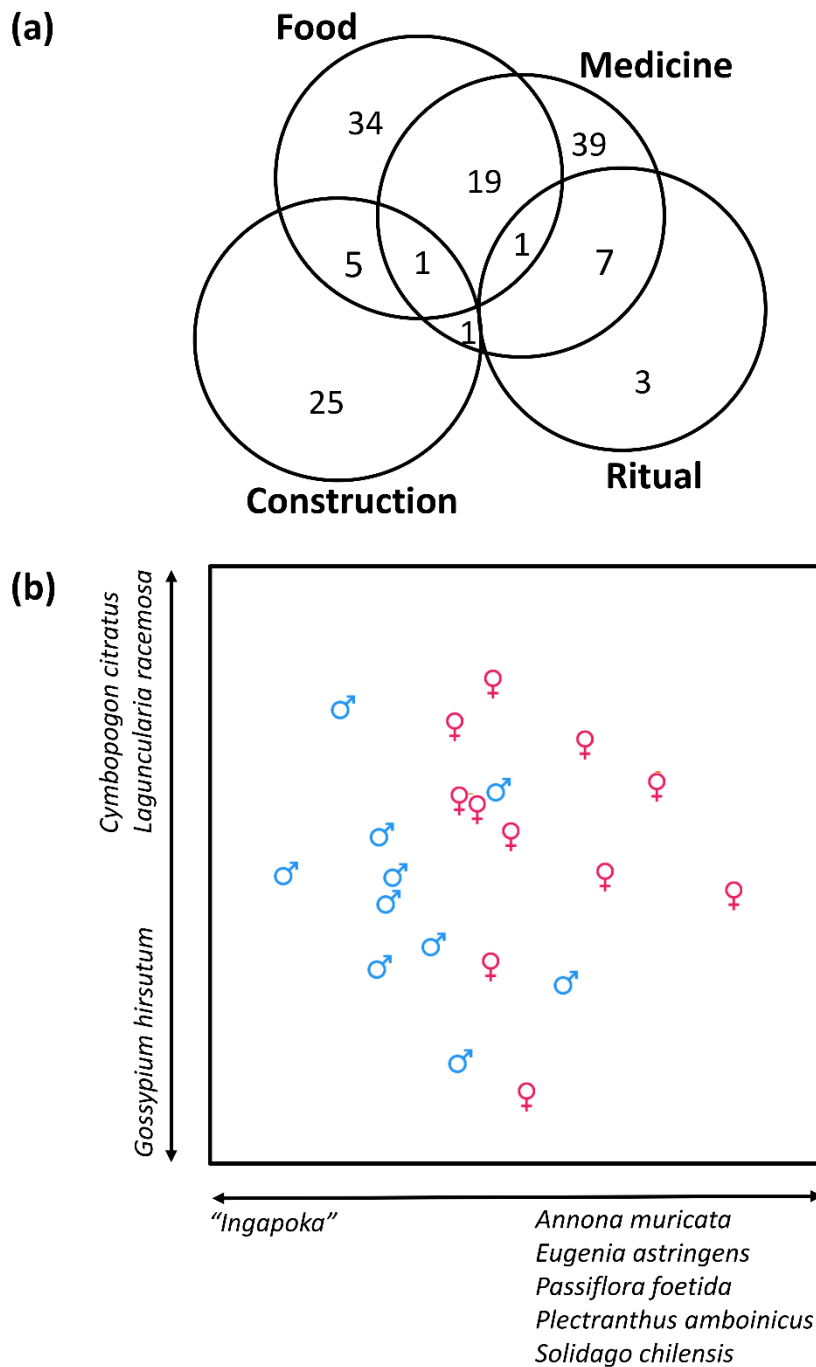

Fig. 2. Venn diagram (a) showing the number of plants cited within each plant use category. Note that there were no species which were cited which had both ritual and construction purposes, or both food and ritual purposes. The patterns of plant knowledge of 21 traditional experts (depicted by male and female symbol marker) is visualized in a Non-metric multidimensional scaling ordination, which shows a gender segregation in terms of the plants cited. The plants listed along each axis represent the species which had a Spearman-rank correlation of  $r > 0.5$  or  $< -0.5$  with each ordination axis, signifying their influence in the ordination patterns.

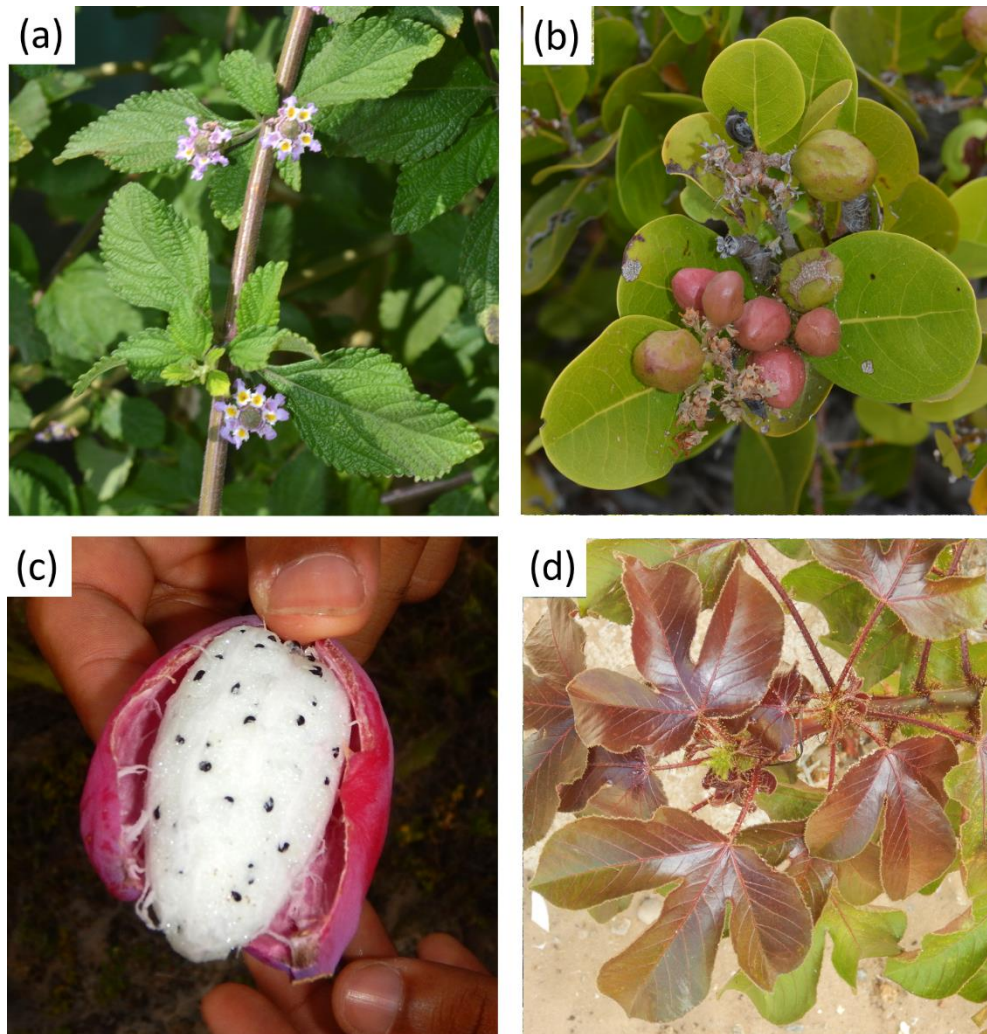

Figure 3. Medicinal plant use in traditional fishermen communities in the littoral north of Bahia, Brazil includes cultivated plants used broadly in the region such as (a) *Lippia alba* (Verbenaceae) and also (b) wild-harvested species such as *Chrysobalanus icaco* (Chrysobalanaceae). Non-conventional plant foods such as (c) *Cereus fernambucensis* (Cactaceae) are also utilized by the community. The leaves of (d) *Jatropha gossypifolia* (Euphorbiaceae) are used in blessing rituals.



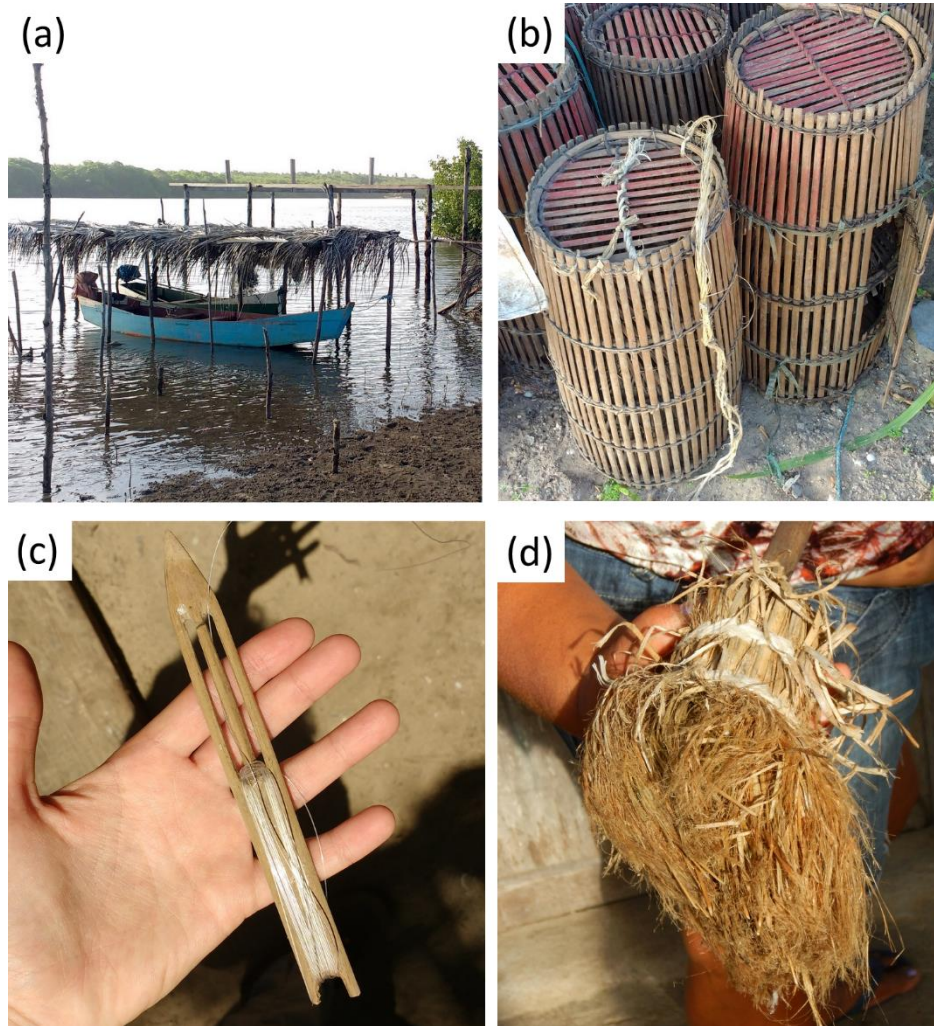

Figure 4. Wood resources and fibres used in construction, fishing practices and daily-use implements in an artisanal fishing community in the littoral north of Bahia, Brazil. The wood of mangrove tree, *Rhizophora mangle* (Rhizophoraceae) and palm leaf thatch used to construct (a) boat shelters; (b) slivers of the rachis of the palm *Attalaea funifera* (Arecaceae) bound together by cordage of *Davilla flexuosa* (Dilleniaceae) to make crab traps; (c) a net-mending needle carved from *Tocoyena bullata* (Rubiaceae); broom heads made from the leaf fibres of *A. funifera*.



Table 1 Traditional plants use in artisanal fishing communities in northeast Bahia, Brazil.

| Scientific name                 | Family           | Nome local           | Use category and mode of use                                                                                                                                                                                                                 | Status and manner of procurement                                                                                                                           | Use Value (UV) | Lifeform |
|---------------------------------|------------------|----------------------|----------------------------------------------------------------------------------------------------------------------------------------------------------------------------------------------------------------------------------------------|------------------------------------------------------------------------------------------------------------------------------------------------------------|----------------|----------|
| <i>Abarema filamentosa</i>      | Fabaceae         | Barbatimão, Babatenã | <i>Medicine</i> - Bark collected from wild growing trees and boiled to make a tea to drink for toothache. The bark tea is also used as a bath to wash wounds, to treat inflammation in women, and also to help with healing after childbirth | Native in surrounding forests. Wild harvested                                                                                                              | 0.10           | Tree     |
| <i>Allagoptera brevicalyx</i>   | Arecaceae        | Caxandó              | <i>Food</i> - Fruits eaten raw. "Milk" extracted from the flesh and used for cooking                                                                                                                                                         | Native in surrounding shrublands. Wild harvested                                                                                                           | 0.24           | Shrub    |
| <i>Aloe vera</i>                | Xanthorrhoeaceae | Barbosa              | <i>Medicine</i> - The gel extracted from the leaves applied topically on scalp or on wounds, or made into juices and drunk as a tonic or stomach complaints                                                                                  | Non-native from the Arabian Peninsula. Cultivated in home gardens for use                                                                                  | 0.10           | Herb     |
| <i>Alternanthera brasiliana</i> | Amaranthaceae    | Bachitrim, Infectrim | <i>Medicine</i> - Leaves boiled to make tea and drunk for combating inflammation, or used as a gargle for sore throats. The tea is also applied topically on minor wounds.                                                                   | Native. Cultivated in home gardens for use                                                                                                                 | 0.19           | Subshrub |
| <i>Anacardium occidentale</i>   | Anacardiaceae    | Caju, Cajueira       | <i>Medicine</i> - Bark extracted, beaten and used to make a bath for skin problems<br><i>Food</i> - Fruit fleshy parts are eaten raw, and made into juices or sweet preserves. The nuts are roasted, dekernelled, and eaten.                 | Native in surrounding shrublands and forests. Wild harvested, and also occasionally cultivated for domestic use. Fruits and nuts also bought from markets. | 0.52           | Tree     |

---

|                                 |                  |                            |                                                                                                                                                            |                                                                            |      |      |
|---------------------------------|------------------|----------------------------|------------------------------------------------------------------------------------------------------------------------------------------------------------|----------------------------------------------------------------------------|------|------|
| <i>Annona muricata</i>          | Annonaceae       | Graviola                   | <i>Medicine</i> - Leaves boiled to make tea and drunk to lower cholesterol, lose weight, and for post-operation recovery<br><i>Food</i> - Fruits eaten raw | Naturalized. Cultivated in home gardens for use                            | 0.24 | Tree |
| <i>Annona salzmanii</i>         | Annonaceae       | Araticum, araticum-da-mata | <i>Food</i> - fruits eaten raw                                                                                                                             | Native. Collected from surrounding forests.                                | 0.19 | Tree |
| <i>Annona squamosa</i>          | Annonaceae       | Pinha                      | <i>Food</i> - fruits eaten raw                                                                                                                             | Naturalized. Cultivated in home gardens for use                            | 0.19 | Tree |
| <i>Anethum graveolens</i>       | Apiaceae         | Endio                      | <i>Medicine</i> - Seeds are boiled to make a tea and served to newborn babies. The tea is also taken for stomach complaints.                               | Non-native. The seeds are bought at markets                                | 0.10 | Herb |
| <i>Aristolochia labiate</i>     | Aristolochiaceae | Milome                     | <i>Medicine</i> - Stems used to make a tea and drunk for pain and coughs. Also infused in alcohol and taken for stomach bloating                           | Native. Collected from surrounding forests.                                | 0.33 | Vine |
| <i>Artocarpus heterophyllus</i> | Moraceae         | Jaqueira                   | <i>Construction</i> - Wood used for canoe making, making oars, and house roofs<br><i>Food</i> - the inner flesh of fruits are eaten                        | Non-native from Southeast Asia. Naturalized and cultivated in home gardens | 0.29 | Tree |

---

|                               |               |                      |                                                                                                                                                                                                                                                                                                                                               |                                                                                                                      |      |      |
|-------------------------------|---------------|----------------------|-----------------------------------------------------------------------------------------------------------------------------------------------------------------------------------------------------------------------------------------------------------------------------------------------------------------------------------------------|----------------------------------------------------------------------------------------------------------------------|------|------|
| <i>Attalea funifera</i>       | Arecaceae     | Quitanda/ Piaçava    | <p><i>Construction</i> - entire leaves used as thatch for house building</p> <p><i>Fishing implements</i> - leaf stalks used to make crap traps</p> <p><i>Fibres</i> - Leaf stalks cut into strips and used to make brooms</p> <p><i>Food</i> - The inner flesh of fruits are eaten. The inner flesh is also made into an oil for cooking</p> | Native. Also cultivated in plantations in the region. Harvested from restinga or forest habitats or from plantations | 0.29 | Tree |
| <i>Avicennia schaueriana</i>  | Avicenniaceae | Siribeira            | <p><i>Construction</i> - Wood used for house construction</p>                                                                                                                                                                                                                                                                                 | Native. Harvested from surrounding mangroves                                                                         | 0.05 | Tree |
| <i>Bactris setosa</i>         | Arecaceae     | Tucum                | <p><i>Fishing implements</i> - Fibres extracted from leaf stalk to make fishing nets</p> <p><i>Food</i> - Fruits eaten</p>                                                                                                                                                                                                                    | Native. Harvested from surrounding forests                                                                           | 0.33 | Tree |
| <i>Bambusa sp.</i>            | Poaceae       | Bambú                | <p><i>Construction</i> – Used as part of the structure of mud houses. Also used for making furniture.</p> <p><i>Fishing implements</i> – Used to make fishing rods to catch fish and <i>Goniopsis cruentata</i> (aratu-vermelha) crabs</p>                                                                                                    | Non-native and naturalized in the region.                                                                            | 0.19 | Tree |
| <i>Bowdichia virgilioides</i> | Fabaceae      | Sucupiruçu, sucupira | <p><i>Construction</i> - Wood used to construct boats, canoes, and homes</p>                                                                                                                                                                                                                                                                  | Native. Harvested from waysides and surrounding forests                                                              | 0.10 | Tree |
| <i>Brodriguesia santonii</i>  | Fabaceae      | Favera               | <p><i>Construction</i> - canoe making, particularly to make the bows, miscellaneous wood implements</p>                                                                                                                                                                                                                                       | Native. Harvested from surrounding forest                                                                            | 0.10 | Tree |



|                                |                  |                  |                                                                                                                                                                                                                         |                                                                             |      |       |
|--------------------------------|------------------|------------------|-------------------------------------------------------------------------------------------------------------------------------------------------------------------------------------------------------------------------|-----------------------------------------------------------------------------|------|-------|
| <i>Byrsonima sericea.</i>      | Malpighiaceae    | Murici           | <i>Medicine</i> - Leaves used to make a tea and drunk for lowering cholesterol and also for slimming<br><i>Food</i> - Fruits eaten raw                                                                                  | Native. Harvested from surrounding forest and restinga                      | 0.05 | Shrub |
| <i>Caesalpinia pulcherrima</i> | Fabaceae         | Maravilha        | <i>Medicine</i> - Leaves used to make a tea for washing wounds                                                                                                                                                          | Non-native. Cultivated in home gardens                                      | 0.05 | Shrub |
| <i>Capsicum annuum</i>         | Solanaceae       | Pimenta          | <i>Food</i> - Fruits eaten<br><i>Medicine</i> - Leaves used to treat boils<br><i>Ritual</i> - In a ritualistic use, two leaves wrapped around a cut on a finger in the formation of a cross is believed to help healing | Non-native. Cultivated in home gardens                                      | 0.05 | Shrub |
| <i>Catharanthus roseus</i>     | Apocynaceae      | Boa noite        | <i>Medicine</i> - Tea made from leaves and drunk to induce abortion                                                                                                                                                     | Non-native. Cultivated in home gardens                                      | 0.05 | Herb  |
| <i>Cenchrus echinatus</i>      | Poaceae          | Carrapich        | <i>Medicine</i> - The leaves and fruits made into a tea for urinary infections                                                                                                                                          |                                                                             | 0.00 | Herb  |
| <i>Cereus fernambucensis</i>   | Cactaceae        | Mandacaru, Calda | <i>Medicine</i> - The fruit pulp is taken to ease constipation<br><i>Food</i> - The fruits are eaten raw, or candied                                                                                                    | Native. Wild harvested from surrounding beach dune and shrubland vegetation | 0.19 | Shrub |
| <i>Chrysobalanus icaco</i>     | Chrysobalanaceae | Gajiru           | <i>Medicine</i> - A tea is brewed from the debarked stems for treating diabetes<br><i>Food</i> - The fruits are eaten raw                                                                                               | Native. Wild harvested from surrounding beach dune vegetation               | 0.33 | Shrub |
| <i>Citrus limon</i>            | Rutaceae         | limão            | <i>Food</i> - Fruit juice drunk<br><i>Medicine</i> - Fruit used to make tea to counter flu                                                                                                                              | Non-native. Cultivated in home gardens or brought from markets              | 0.14 | Shrub |

|                            |              |                 |                                                                                                                                                                                                                                                                                                                           |                                                                                                           |      |       |
|----------------------------|--------------|-----------------|---------------------------------------------------------------------------------------------------------------------------------------------------------------------------------------------------------------------------------------------------------------------------------------------------------------------------|-----------------------------------------------------------------------------------------------------------|------|-------|
| <i>Cnidoscopus urens</i>   | Urticaceae   | Cansação        | <i>Medicine</i> - The stem pith is extracted to make an eyedrop for eye infections                                                                                                                                                                                                                                        | Native. Wild harvested from surrounding restinga vegetation                                               | 0.10 | Shrub |
| <i>Cocoloba laevis</i>     | Polygonaceae | Pipoquinha      | <i>Food</i> - Fruits eaten raw                                                                                                                                                                                                                                                                                            | Native. Wild harvested from surrounding restinga vegetation                                               | 0.19 | Shrub |
| <i>Cocos nucifera</i>      | Areaceae     | Coco            | <i>Medicine</i> - The meat is cooked and eaten to heal pain<br><i>Food</i> - Fruit juice drunk, and flesh used to make "milk" for cooking<br><i>Construction</i> - The entire leaves used for thatch in home making or for semi-permanent structures<br><i>Others</i> - Fibres are burnt to create smoke to repel insects | Naturalized. Cultivated in beaches and surrounding sandy habitats, and also as a street tree and in homes | 0.48 | Tree  |
| <i>Conocarpus erectus</i>  | Combretaceae | Mangue-de-botão | <i>Construction</i> - Wood used for roof rafters                                                                                                                                                                                                                                                                          | Native. Harvested from surrounding mangrove                                                               | 0.10 | Shrub |
| <i>Cordia obtuse</i>       | Rubiaceae    | Marmelo         | <i>Food</i> - Fruits eaten raw                                                                                                                                                                                                                                                                                            | Native in surrounding shrublands and forests. Wild harvested.                                             | 0.14 | Tree  |
| <i>Costus spicatus</i>     | Costaceae    | Cana de macaco  | <i>Medicine</i> - Leaves used to make a tea for slimming.                                                                                                                                                                                                                                                                 | Native. Cultivated in home gardens                                                                        | 0.10 | Herb  |
| <i>Coutoubea spicata</i>   | Gentianaceae | Papai Nicolao   | <i>Medicine</i> - Entire plant boiled to make a tea and drunk for gastritis                                                                                                                                                                                                                                               | Native. Harvested from surrounding vegetation                                                             | 0.05 | Herb  |
| <i>Cymbopogon citratus</i> | Poaceae      | capim-santo     | <i>Medicine</i> - Leaves boiled to make a tea and drunk as a relaxant, for high blood pressure, and stomach complaints.                                                                                                                                                                                                   | Non-native from South Asia. Cultivated for domestic use.                                                  | 0.38 | Herb  |

|                               |               |                      |                                                                                                                                                                                                                                                                                        |                                                          |      |       |
|-------------------------------|---------------|----------------------|----------------------------------------------------------------------------------------------------------------------------------------------------------------------------------------------------------------------------------------------------------------------------------------|----------------------------------------------------------|------|-------|
| <i>Cymbopogon nardus</i>      | Poaceae       | capim-citronela      | <i>Medicine</i> - Leaves used to make insect repellent                                                                                                                                                                                                                                 | Non-native from South Asia. Cultivated for domestic use. | 0.05 | Herb  |
| <i>Dalbergia nigra</i>        | Fabaceae      | Jacarandá            | <i>Construction</i> - Wood used to make canoes                                                                                                                                                                                                                                         |                                                          | 0.05 | Tree  |
| <i>Davilla flexuosa</i>       | Dilleniaceae  | Cipó-de-fogo         | <i>Cordage</i> - stems collected from surrounding forest to make cordage for securing fishing implements or other construction purposes                                                                                                                                                | Native, harvested from surrounding forest.               | 0.05 | Vine  |
| <i>Dieffenbachia picta</i>    | Araceae       | Comingo-ningeum-pode | <i>Ritual</i> - Leaves used in prayer and blessings                                                                                                                                                                                                                                    | Non-native                                               | 0.05 | Herb  |
| <i>Dysphania ambrosioides</i> | Amaranthaceae | Matruz, Mastruz      | <i>Medicine</i> - Shoots used to make a tea or blended into juice and drunk to heal pain; clearing chest congestions, for inflammation, and to expel worms. Shoots mashed into a paste and applied topically to scrap wounds or cuts.<br><i>Ritual</i> - Used for blessings or prayers | Naturalized. Cultivated for domestic use.                | 0.67 | Herb  |
| <i>Elaeis guineensis</i>      | Arecaceae     | Dende                | <i>Fishing implements</i> – Construction of fishing fences.<br><i>Food</i> - fruits eaten                                                                                                                                                                                              | Naturalized. Cultivated for domestic use.                | 0.05 | Tree  |
| <i>Erythrina velutina</i>     | Fabaceae      | Malungu              | <i>Construction</i> – Wood used to make canoes                                                                                                                                                                                                                                         | Native. Harvested from forests                           | 0.10 | Tree  |
| <i>Eugenia astringens</i>     | Myrtaceae     | Murta                | <i>Food</i> - Fruits eaten raw, or made into candies                                                                                                                                                                                                                                   | Native. Harvested from restinga and sand dune vegetation | 0.29 | Shrub |

|                                 |               |                  |                                                                                                                                                                                                                 |                                                            |      |       |
|---------------------------------|---------------|------------------|-----------------------------------------------------------------------------------------------------------------------------------------------------------------------------------------------------------------|------------------------------------------------------------|------|-------|
| <i>Eugenia uniflora</i>         | Myrtaceae     | Pitanga          | <i>Medicine</i> - Leaves boiled to make a tea and drunk for fever or flu. In conjunction, the cooled tea is also used as a headwash at night.<br><i>Food</i> - Fruits eaten raw                                 | Native. Cultivated in home gardens.                        | 0.24 | Tree  |
| <i>Euphorbia hirta</i>          | Euphorbiaceae | Erva Santa Luzia | <i>Medicine</i> – The sap is used as na eyewash and applied to wound to promote healing and to combat infections.                                                                                               | Native. Grows on waysides                                  | 0.05 | Herb  |
| <i>Foeniculum vulgare</i>       | Apiaceae      | Erva Doce        | <i>Medicine</i> - Seeds used to make a tea and administered to children for colic. The tea is also taken for stomach complaints.<br><i>Food</i> - The seeds are used to flavour cachaca (an alcoholic beverage) | Non-native. Cultivated in home gardens.                    | 0.19 | Herb  |
| <i>Garcinia gardneriana</i>     | Clusiaceae    | Bacupari         | <i>Food</i> - Fruits eaten raw                                                                                                                                                                                  | Native. Harvested from the surrounding restinga vegetation | 0.10 | Tree  |
| <i>Genipa americana</i>         | Rubiaceae     | Genipapo         | <i>Medicine</i> - Fruit made into juices and drunk as a tonic and for anemia<br><i>Food</i> - Fruits eaten raw                                                                                                  | Native. Cultivated in home gardens.                        | 0.10 | Tree  |
| <i>Gossypium spp.</i>           | Malvaceae     | Algodao          | <i>Medicine</i> - Leaves boiled to make tea and drunk for flu, inflammation                                                                                                                                     | Non-native. Cultivated in home gardens                     | 0.33 | Shrub |
| <i>Gymnanthemum amygdalinum</i> | Asteraceae    | Alumã            | <i>Medicine</i> – Use not specified                                                                                                                                                                             | Non-native. Cultivated in home gardens                     | 0.05 | Shrub |

|                              |               |                     |                                                                                                                                                                                                                                     |                                                                 |      |       |
|------------------------------|---------------|---------------------|-------------------------------------------------------------------------------------------------------------------------------------------------------------------------------------------------------------------------------------|-----------------------------------------------------------------|------|-------|
| <i>Hancornia speciosa</i>    | Apocynaceae   | Mangaba             | <p><i>Medicine</i> - The sap is collected and mixed with water and drunk for stomach issues.</p> <p><i>Food</i> - the fruits are collected from the surrounding forests and eaten raw. The pulp is made into candy or popsicles</p> | Native. Wild harvested from surrounding forests and shrublands. | 0.33 | Tree  |
| <i>Hymenolobium excelsum</i> | Fabaceae      | Angelim             | <p><i>Construction</i> - Wood used for construction</p>                                                                                                                                                                             | Native. Wild harvested from surrounding forests.                | 0.05 | Tree  |
| <i>Inga spp.</i>             | Fabaceae      | Inga                | <p><i>Food</i> - the fruits are collected from the surrounding forests and eaten raw</p> <p><i>Construction</i> - Wood used for house construction</p>                                                                              | Native. Wild harvested from surrounding forests.                | 0.14 | Tree  |
| <i>Ixora coccinea</i>        | Rubiaceae     | Ixora               | <p><i>Food</i> - the fruits are eaten opportunistically by children</p>                                                                                                                                                             | Non-native from South India. Cultivated as an ornamental        | 0.05 | Shrub |
| <i>Jatropha gossypifolia</i> | Euphorbiaceae | Pinhão, Pinhão roxa | <p><i>Ritual</i> - Leaves used in prayer and blessings</p>                                                                                                                                                                          | Native. Cultivated in home gardens                              | 0.38 | Shrub |
| <i>Jatropha curcas</i>       | Euphorbiaceae | Pinhão branco       | <p><i>Medicine</i> - Leaves used to make a tea for asthma</p> <p><i>Ritual</i> - Leaves used in prayer and blessings</p>                                                                                                            | Non-native. Cultivated in home gardens.                         | 0.05 | Tree  |



|                              |               |                         |                                                                                                                                                                                                                                            |                                                                        |      |       |
|------------------------------|---------------|-------------------------|--------------------------------------------------------------------------------------------------------------------------------------------------------------------------------------------------------------------------------------------|------------------------------------------------------------------------|------|-------|
| <i>Kalanchoe crenata</i>     | Crassulaceae  | Folha da Costa          | <i>Medicine</i> - Leaves made into a syrup and drunk for colds. Leaves also or made into a paste applied topically on minor wounds. Leaves also heated in a fire and used to make a compress to treat food fungal infections.              | Non-native. Cultivated in home gardens.                                | 0.24 | Herb  |
| <i>Laguncularia racemosa</i> | Combretaceae  | Mange manso             | <i>Construction</i> - Wood collected from surrounding mangroves to make fishing fences or homes.<br><i>Fishing implements</i> – Used to make crab traps                                                                                    | Native. Harvested from surrounding mangroves                           | 0.38 | Tree  |
| <i>Lantana camara</i>        | Verbenaceae   | Camara                  | <i>Food</i> - Leaves used to make a tea as a coffee substitute                                                                                                                                                                             | Native.                                                                | 0.05 | Shrub |
| <i>Laurus nolilis</i>        | Lauraceae     | Lauro                   | <i>Medicine</i> - Leaves and shoots boiled to make tea and drunk for menstrual colic                                                                                                                                                       | Non-native. Obtained from markets                                      | 0.05 | Tree  |
| <i>Lippia alba</i>           | Verbenaceae   | Cidreira, Erva-cidreira | <i>Medicine</i> - Leaves and shoots boiled to make tea and drunk for colic, food poisoning, stomach complaints, to lower blood pressure, as a general relaxant, and to aid with sleeping.<br><i>Ritual</i> - Used for prayers or blessings | Non-native, but naturalized and cultivated in home gardens             | 0.81 | Shrub |
| <i>Malpighia glabra</i>      | Malpighiaceae | Acerola                 | <i>Medicine</i> - Leaves used to make a tea for washing head when having a flu<br><i>Food</i> - Fruits eaten raw                                                                                                                           | Non-native. Cultivated in home gardens                                 | 0.19 | Shrub |
| <i>Mangifera indica</i>      | Anacardiaceae | Mangeira                | <i>Medicine</i> - Leaves used to make a tea to treat fever<br><i>Food</i> - Fruits eaten raw                                                                                                                                               | Non-native from Asia. Cultivated as a wayside tree and in home gardens | 0.19 | Tree  |

|                               |               |                      |                                                                                                                                                                                                                         |                                                        |      |       |
|-------------------------------|---------------|----------------------|-------------------------------------------------------------------------------------------------------------------------------------------------------------------------------------------------------------------------|--------------------------------------------------------|------|-------|
| <i>Manilkara salzmanii</i>    | Sapotaceae    | Maçaranduba          | <i>Food</i> - Fruits eaten raw<br><i>Construction</i> - Wood used to make canoes, house roofs                                                                                                                           | Native tree from surrounding forests                   | 0.43 | Tree  |
| <i>Mentha x villosum</i>      | Lamiaceae     | Hortelá miudo        | <i>Medicine</i> - A juice is made from the fresh leaves and stems with a blender and drunk for treating worms and inflammation.<br><i>Food</i> - Fresh or dried leaves used as a seasoning to cook beans, meat or fish. | Non-native. Naturalized and cultivated in home gardens | 0.19 | Herb  |
| <i>Mesophaerum pectinatum</i> | Lamiaceae     | Canudinho            | <i>Medicine</i> - Stems and leaves boiled to make a tea and drunk for slimming, constipation and inflammation.                                                                                                          | Native                                                 | 0.05 | Shrub |
| <i>Morinda citrifolia</i>     | Rubiaceae     | Noni                 | <i>Medicine</i> - Fruits blended with grapes juice to make a tonic for lowering blood pressure and for muscular pains                                                                                                   | Non-native tree from Asia. Cultivated in home gardens  | 0.10 | Tree  |
| <i>Momordica charantia</i>    | Cucurbitaceae | melão-de-são-caetano | <i>Food</i> - Fruits eaten                                                                                                                                                                                              | Non-native. Naturalized.                               | 0.05 | Vine  |
| <i>Morus spp.</i>             | Moraceae      | Amora                | <i>Medicine</i> - Leaves used to make a tea for lowering blood cholesterol, losing weight, and for pains in general                                                                                                     | Non-native. Cultivated in home gardens.                | 0.19 | Tree  |
| <i>Musa paradisiaca</i>       | Musaceae      | Bananeira            | <i>Medicine</i> - Leaves used to make a tea for slimming.                                                                                                                                                               | Non-native. Cultivated in home gardens.                | 0.05 | Tree  |

|                               |                |                               |                                                                                                                                                          |                                                                            |      |       |
|-------------------------------|----------------|-------------------------------|----------------------------------------------------------------------------------------------------------------------------------------------------------|----------------------------------------------------------------------------|------|-------|
| <i>Myrciaria floribunda</i>   | Myrtaceae      | Cambui                        | <i>Food</i> - Fruits collected from surround forest and eaten raw, made into juices, and used to flavour alcoholic beverages (cachacá)                   | Native. Harvested from surrounding forest                                  | 0.48 | Shrub |
| <i>Nerium oleander</i>        | Apocynaceae    | Espiradeira                   | <i>Medicine</i> - Leaves used to make a tea for abortion<br><i>Ritual</i> - Used in blessing and prayers                                                 | Non-native. Cultivated in home gardens.                                    | 0.05 | Shrub |
| <i>Ocimum basilicum</i>       | Lamiaceae      | Manjericao                    | <i>Food</i> - Leaves used as a spice for cooking<br><i>Medicine</i> - Leaves boiled to make a tea and drunk to counter flu, and also to promote slimming | Non-native. Cultivated in home gardens.                                    | 0.19 | Herb  |
| <i>Ocimum gratissimum</i>     | Lamiaceae      | Quiôîô                        | <i>Medicine</i> - Leaves boiled to make a tea and drunk for flu.                                                                                         | Non-native. Cultivated in home gardens.                                    | 0.05 | Herb  |
| <i>Ocotea</i> sp.             | Lauraceae      | Louro-branco                  | <i>Construction</i> - Wood used to construction house roofs and also boat oars                                                                           | Native. Harvested from the surrounding forest vegetation                   | 0.10 | Tree  |
| <i>Passiflora</i> spp.        | Passifloraceae | Maracujá,<br>Maracujá-do-mato | <i>Food</i> - Fruits eaten raw                                                                                                                           | Native. Harvested from the surrounding forest vegetation. Also cultivated. | 0.24 | Vine  |
| <i>Passiflora foetida</i>     | Passifloraceae | Ruge                          | <i>Food</i> - Fruits eaten raw                                                                                                                           | Native. Harvested from the surrounding beach dune vegetation               | 0.10 | Vine  |
| <i>Pereskia aculeata</i>      | Cactaceae      | Ora-pro-nóbis                 | <i>Food</i> - Leaves used for cooking or eaten raw in salads                                                                                             | Native, but cultivated for domestic use                                    | 0.05 | Shrub |
| <i>Periandra mediterranea</i> | Fabaceae       | Acampho,<br>Campho            | <i>Medicine</i> - Roots boiled to make tea and drunk for coughs                                                                                          | Native. Harvested in the surrounding restinga vegetation                   | 0.05 | Shrub |

|                                    |                |                        |                                                                                                                                                                         |                                                                                       |      |       |
|------------------------------------|----------------|------------------------|-------------------------------------------------------------------------------------------------------------------------------------------------------------------------|---------------------------------------------------------------------------------------|------|-------|
| <i>Persea americana</i>            | Lauraceae      | Abacateira             | <i>Medicine</i> - Leaves boiled to make a tea and drunk for kidney problems and toothache. Bark boiled to make tea for slimming<br><i>Food</i> - Fruits eaten           | Non-native from south Mexico. Naturalized and cultivated in home gardens              | 0.19 | Tree  |
| <i>Petiveria alliacea</i>          | Phytolaccaceae | Guiné                  | <i>Medicine</i> - Roots boiled to make tea to promote wound healing                                                                                                     | Native.                                                                               | 0.05 | Herb  |
| <i>Pfaffia glomerata</i>           | Amaranthaceae  | Anador                 | <i>Medicine</i> - Leaves boiled to make a tea and drunk for headaches, fever and stomach complaints.                                                                    | Native, but cultivated for domestic use                                               | 0.14 | Shrub |
| <i>Phyllanthus niruri</i>          | Phyllanthaceae | Quebra pedra           | <i>Medicine</i> - Shoots used to make a tea and drunk for kidney stones                                                                                                 | Native. Grows by waysides                                                             | 0.19 | Herb  |
| <i>Physalis angulata</i>           | Solanaceae     | Saco de bode           | <i>Food</i> - Fruits eaten                                                                                                                                              | Naturalised, and also cultivated for domestic use                                     | 0.05 | Herb  |
| <i>Pilea microphylla</i>           | Urticaceae     | Brilhantina            | <i>Medicine</i> - Shoots and leaves used to make a tea and drunk for stomach pains and diarrhea<br><i>Food</i> - Shoots and leaves used in salads and blended in juices | Non-native from South and Central America. Naturalized and cultivated in home gardens | 0.14 | Herb  |
| <i>Pseudopiptadenia suaveolens</i> | Fabaceae       | Timborana              | <i>Fishing implements</i> - The wood is used to make the covo and fishing baskets (camboa)                                                                              | Native. Harvested from forest                                                         | 0.10 | Tree  |
| <i>Plectranthus amboinicus</i>     | Lamiaceae      | Hotelá, Hortelá grossa | <i>Medicine</i> - Leaves used for making a syrup for congested chest<br><i>Food</i> - Leaves used for cooking with meat                                                 | Non-native from India. Cultivated in home gardens                                     | 0.29 | Shrub |

|                               |               |                 |                                                                                                                                                                                                             |                                                                          |      |       |
|-------------------------------|---------------|-----------------|-------------------------------------------------------------------------------------------------------------------------------------------------------------------------------------------------------------|--------------------------------------------------------------------------|------|-------|
| <i>Plectranthus barbatus</i>  | Lamiaceae     | Oxala, Sete Dor | <i>Medicine</i> - Leaves used to make a tea for stomach complains                                                                                                                                           | Non-native from India. Cultivated in home gardens                        | 0.19 | Shrub |
| <i>Plectranthus neochilus</i> | Lamiaceae     | Boldo           | <i>Medicine</i> - Leaves used to make a tea for stomach complains, intestinal pains, flatulence, and for expelling worms                                                                                    | Non-native from India. Cultivated in home gardens                        | 0.43 | Herb  |
| <i>Portulaca oleracea</i>     | Portulacaceae | Beldroega       | <i>Food</i> - Leaves used for cooking or eaten raw in salads                                                                                                                                                | Native. Grows by waysides, and also cultivated in home gardens           | 0.05 | Herb  |
| <i>Protium heptaphyllum</i>   | Burseraceae   | Amescla         | <i>Medicine</i> : Leaves used to make a tea for flu. Resin taken internally<br><i>Ritual</i> - The bark is burnt to produce smoke to cleanse negative energies                                              | Native. Harvested from surround forests                                  | 0.10 | Tree  |
| <i>Psidium guajava</i>        | Myrtaceae     | Goiaba          | <i>Food</i> - Fruits eaten raw<br><i>Medicine</i> - Leaves boiled to make a tea for treating diarrhea, and also to ease toothache                                                                           | Native. Cultivated in home gardens                                       | 0.14 | Tree  |
| <i>Psidium guineense</i>      | Myrtaceae     | Araçá-mirim     | <i>Food</i> - Fruits eaten raw                                                                                                                                                                              | Native. Harvested from surround forests                                  | 0.10 | Tree  |
| <i>Psidium rufum</i>          | Myrtaceae     | Araçá-cagão     | <i>Food</i> - Fruits eaten raw or candied                                                                                                                                                                   | Native. Harvested from surround forests                                  | 0.24 | Tree  |
| <i>Punica granatum</i>        | Lythraceae    | Romã            | <i>Medicine</i> - The fruit husks made into a tea and gargled for sore throats. The leaves, fruit husks and seeds boiled to make a tea and drunk for throat inflammation.<br><i>Food</i> - Fruits eaten raw | Non-native from Iran and North India. Cultivated in home gardens for use | 0.10 | Shrub |

---

|                                |                |                |                                                                                                                                                                                                                                                                                                                                                                                                            |                                                                                   |      |      |
|--------------------------------|----------------|----------------|------------------------------------------------------------------------------------------------------------------------------------------------------------------------------------------------------------------------------------------------------------------------------------------------------------------------------------------------------------------------------------------------------------|-----------------------------------------------------------------------------------|------|------|
| <i>Rhizophora mangle</i>       | Rhizophoraceae | Mange vermelha | <p><i>Construction</i> - Trunk poles harvested for house-making and other semi-permanent structures</p> <p><i>Fishing implements</i> - The branches are beaten against the crab traps to release a scent that is believed to attract <i>Goniopsis cruentata</i> (aratu-vermelha) crabs. The branches are also used to make the crab traps.</p> <p><i>Dyes</i> - A red dye is extractable from the wood</p> | Native. Harvested from surrounding mangroves                                      | 0.52 | Tree |
| <i>Ruta graveolens</i>         | Rutaceae       | Arruda         | <p><i>Ritual</i> - Leaves used in prayer and blessings</p>                                                                                                                                                                                                                                                                                                                                                 | Non-native from Europe.                                                           | 0.05 | Herb |
| <i>Saccharum officinarum</i>   | Poaceae        | Cana           | <p><i>Medicine</i> - Juice expressed from the stems used to treat low blood pressure</p>                                                                                                                                                                                                                                                                                                                   | Non-native from Southeast Asia. Cultivated in home gardens or bought from markets | 0.05 | Herb |
| <i>Schinus terebinthifolia</i> | Anacardiaceae  | Aroeira        | <p><i>Medicine</i> - Leaves boiled to make a tea for gargling for healing after tooth removal. Tea is also drunk for inflammation. Tea made from boiled leaves or bark is used in a bath to treat inflammation in women, and also children having skin afflictions. The leaves are used to wrap minor cuts on the hand. Considered a panacea</p> <p><i>Food</i> - The fruits are eaten raw</p>             | Native. Harvested in the surrounding restinga vegetation                          | 0.38 | Tree |

---

|                            |                |                    |                                                                                                                                                       |                                                                   |      |       |
|----------------------------|----------------|--------------------|-------------------------------------------------------------------------------------------------------------------------------------------------------|-------------------------------------------------------------------|------|-------|
| <i>Scoparia dulcis</i>     | Plantaginaceae | Vassourinha        | <i>Medicine</i> - Entire plant boiled and water is used to wash wounds<br><i>Ritual</i> - Shoots used for prayer and for blessing                     | Native. Occurs on waysides.                                       | 0.19 | Herb  |
| <i>Senna obtusifolia</i>   | Fabaceae       | Senna              | <i>Medicine</i> – Leaves used to make a tea and drunk for inflammation                                                                                | Native. Occurs on waysides.                                       | 0.05 | Shrub |
| <i>Senna occidentalis</i>  | Fabaceae       | Fedegoso           | <i>Medicine</i> - Leaves and shoots boiled to make a tea and drunk for flu and stomachache<br><i>Ritual</i> - Shoots used for prayer and for blessing | Native. Occurs on waysides, but also cultivated for domestic use. | 0.14 | Shrub |
| <i>Solanum paniculatum</i> | Solanaceae     | Jurubeba           | <i>Medicine</i> – Leaves used to make a tea and drunk for flu                                                                                         | Native. Obtained from markets                                     | 0.10 | Shrub |
| <i>Solidago chilensis</i>  | Asteraceae     | Arnica             | <i>Medicine</i> – Leaves crushed and applied on wounds                                                                                                | Native. Occurs on waysides, but also cultivated for domestic use. | 0.14 | Herb  |
| <i>Spondias mombin</i>     | Anacardiaceae  | Cajarana           | <i>Food</i> - Fruit eaten                                                                                                                             | Native. Planted in home gardens                                   | 0.05 | Tree  |
| <i>Spondias tuberosa</i>   | Anacardiaceae  | Umbu               | <i>Food</i> - Fruit eaten                                                                                                                             | Native. Planted in home gardens                                   | 0.10 | Tree  |
| <i>Stemodia foliosa</i>    | Plantaginaceae | Rabujo de Cachorro | <i>Medicine</i> - Shoots and leaves used to make a tea and drunk for stomach pains, especially for children                                           | Native. Collected wild                                            | 0.05 | Herb  |
| <i>Syagurus coronata</i>   | Arecaceae      | Alicuri            | <i>Food</i> - Fruit eaten                                                                                                                             | Native. Collected wild                                            | 0.24 | Tree  |

---

|                               |               |                           |                                                                                                                                                                               |                                                       |      |       |
|-------------------------------|---------------|---------------------------|-------------------------------------------------------------------------------------------------------------------------------------------------------------------------------|-------------------------------------------------------|------|-------|
| <i>Syagrus schizophylla</i>   | Arecaceae     | Alicuri-oba,<br>Licurioba | <i>Food</i> - Fruit eaten                                                                                                                                                     | Native. Collected wild                                | 0.10 | Tree  |
| <i>Syzygium cuminii</i>       | Myrtaceae     | Jamboláo                  | <i>Medicine</i> - Leaves boiled to make a tea and drunk to lower cholesterol<br><i>Food</i> - Fruits eaten                                                                    | Non-native from Aisa.<br>Cultivated as a street tree  | 0.10 | Tree  |
| <i>Tabebuia</i> spp.          | Bignoniaceae  | Taipoca                   | <i>Fishing implements</i> - Branches historically used for making fishing rods<br><i>Household use</i> - Wood historically used to make beds                                  | Native. Harvested from surrounding forest             | 0.10 | Tree  |
| <i>Talinum paniculatum</i>    | Talinaceae    | Bredo, Maria gorda        | <i>Food</i> – Shoots and leaves eaten as a salad or cooked                                                                                                                    | Native. Cultivated in home gardens                    | 0.05 | Herb  |
| <i>Tamarindus indica</i>      | Fabaceae      | Tamarino                  | <i>Food</i> – Fruits eaten raw                                                                                                                                                | Non-native from India.<br>Cultivated in home gardens  | 0.05 | Tree  |
| <i>Tapirira guianensis</i>    | Anacardiaceae | Pau pombo                 | <i>Food</i> - Fruits eaten raw                                                                                                                                                | Native. Harvested from surrounding forest             | 0.05 | Tree  |
| <i>Terminalia catappa</i>     | Combretaceae  | Amendoa-da-praia, Amêndoa | <i>Medicine</i> - Leaves boiled to make a tea drunk for spinal issues or to lower cholesterol<br><i>Food</i> - The fruits are collected, de-kernelled, and the nuts eaten raw | Non-native from Asia.<br>Cultivated as a wayside tree | 0.10 | Tree  |
| <i>Tocoyena bullata</i>       | Rubaceae      | Genipapinho               | <i>Fishing implements</i> - The wood is used to make the needles used to mend fishing nets                                                                                    | Native. Harvested from surrounding restinga.          | 0.10 | Shrub |
| <i>Zanthoxylon rhoifolium</i> | Rutaceae      | Espinheira cheiroso       | <i>Medicine</i> - Leaves boiled to make a tea and drunk to treat inflammation                                                                                                 | Native. Bought in markets                             | 0.14 | Tree  |

---



|                                        |          |                 |                                                                                                                                                                       |                            |      |               |
|----------------------------------------|----------|-----------------|-----------------------------------------------------------------------------------------------------------------------------------------------------------------------|----------------------------|------|---------------|
| <i>Zornia latifolia var. latifolia</i> | Fabaceae | Arrozinha       | <i>Medicine</i> - Leaves boiled to make a tea drunk for inflammation                                                                                                  | Native. Grows by waysides. | 0.05 | Herb          |
|                                        |          | Juá             | <i>Medicine</i> - Leaves used to whiten teeth                                                                                                                         |                            | 0.05 | Shrub         |
|                                        |          | Cuaça           | <i>Medicine</i> - The stems are boiled to make a tea to treat stomach pains and food poisoning. Also for pains in general                                             |                            | 0.19 | Vine          |
|                                        |          | Limaozinho      | <i>Medicine</i> - Leaves boiled in water to make a bath used for flu. Leaves also used to make a syrup with sugar for internal use.<br><i>Food</i> - Fruits eaten raw |                            | 0.10 | Tree          |
|                                        |          | Tripa de ovelha | <i>Food</i> - Fruits eaten raw                                                                                                                                        |                            | 0.05 | Tree          |
|                                        |          | Biriba          | <i>Food</i> - Fruits eaten raw                                                                                                                                        |                            | 0.05 | Tree          |
|                                        |          | Beijuze         | <i>Food</i> - Fruits eaten raw                                                                                                                                        |                            | 0.05 |               |
|                                        |          | Capim da Praia  | <i>Construction</i> – Entire plants used for stuffing pillows                                                                                                         |                            | 0.05 | Grass         |
|                                        |          | Piripiri        | <i>Food</i> - Fruits eaten raw                                                                                                                                        |                            | 0.05 | Not specified |
|                                        |          | Bombão          | <i>Food</i> - Fruits eaten raw                                                                                                                                        |                            | 0.10 | Shrub         |
|                                        |          | Fruta de Paka   | <i>Food</i> - Fruits eaten raw                                                                                                                                        |                            | 0.05 | Tree          |

---

|                        |                                                                                                                                |      |       |
|------------------------|--------------------------------------------------------------------------------------------------------------------------------|------|-------|
| Joaninha               | <i>Food</i> - Fruits eaten raw                                                                                                 | 0.05 | Shrub |
| Acalypi                | <i>Food</i> - Fruits eaten raw                                                                                                 | 0.05 | Shrub |
| pindaíba               | <i>Food</i> - Fruits eaten raw                                                                                                 | 0.14 | Shrub |
| embira-branca          | <i>Construction</i> - Wood used for construction                                                                               | 0.05 | Tree  |
| embira-vermelha        | <i>Construction</i> - Wood used for construction of houses                                                                     | 0.05 | Tree  |
| quina-quina            | <i>Medicine</i> - Tea made from leaves and drunk for infections                                                                | 0.05 | Tree  |
| Pequimbola             | <i>Fishing technology</i> - Leaves broken and rubbed in the insides of shrimp vases to attract shrimp.                         | 0.05 | Tree  |
| Podarco                | <i>Fishing technology</i> - Branches used to make fishing implements to catch Aratu crabs                                      | 0.05 | Tree  |
| Pau darco              | <i>Medicine</i> - Bark boiled to make a tea and drunk for infection<br><i>Construction</i> - Wood used for constructing canoes | 0.10 | Tree  |
| Imadeira               | <i>Construction</i> – Wood used for home construction                                                                          | 0.05 | Tree  |
| Ingapoka               | <i>Construction</i> – Wood used for home construction                                                                          | 0.14 | Tree  |
| Lande                  | <i>Construction</i> – Wood used for construction of canoes                                                                     | 0.05 | Tree  |
| Juerama                | <i>Construction</i> – Wood for construction of boat parts                                                                      | 0.05 | Tree  |
| Jangada                | <i>Construction</i> – Wood used for construction of canoes                                                                     | 0.05 | Tree  |
| Flor de veado          | <i>Food</i> – Flowers eaten                                                                                                    | 0.05 | Vine  |
| Cipo para conjuntivite | <i>Medicine</i> - Vine cut and the water inside used as an eyedrop for conjunctivitis                                          | 0.05 | Vine  |

---

Table 2. Mean number of citations of plant uses within each category by male and female traditional experts in a traditional fishermen community in northeast Brazil. #Note that numbers for the plant distribution category are calculated based only on the 116 plant species which we could identify at least to genus level. Note also that we did not calculate means and inferential statistics for climbers because of the low number of citations in this category. T-statistics of t-tests and P values comparing the number of citations of plants under each category by females and males and are presented. Significant P values are highlighted. The Informant Consensus Factor (ICF) denotes the degree to which experts within the community may exchange information about plant use, where high values (nearing 1) mean that the plant use information within each respective category is well exchanged among experts, and low values denoting the contrary.

|                                             | All informants | Females | Males | T (p)                     | ICF  |
|---------------------------------------------|----------------|---------|-------|---------------------------|------|
| All                                         | 20.5           | 24.7    | 15.9  | 2.034 (0.056)             | N.A  |
| Medicinal                                   | 11.9           | 15.6    | 7.8   | <b>3.365 (0.003)</b>      | 0.72 |
| Food – All                                  | 10.9           | 13.9    | 7.6   | <b>2.316 (0.032)</b>      | 0.70 |
| Food – non-conventional<br>plant foods only | 7.4            | 8.8     | 5.8   | 1595 (0.127)              | 0.69 |
| Construction &<br>technology in general     | 4.6            | 3.9     | 5.3   | 0.885 (0.391)             | 0.68 |
| Fishing technology only                     | 3.3            | 2.7     | 3.9   | 1.086 (0.293)             | 0.65 |
| Religious/Mystical                          | 2.5            | 2.8     | 2.2   | 0.549 (0.590)             | 0.81 |
| <i>#Plant distribution or<br/>lifeform</i>  |                |         |       |                           |      |
| Native species                              | 10.1           | 11.5    | 8.5   | 1.057 (0.304)             | 0.69 |
| Non-native species                          | 7.8            | 10.9    | 4.3   | <b>4.860 (&gt; 0.001)</b> | 0.70 |
| Tree                                        | 8.6            | 10      | 7.1   | 1.406 (0.176)             | 0.73 |
| Shrub                                       | 5.5            | 6.6     | 4.3   | 1.470 (0.157)             | 0.73 |
| Herb                                        | 3.9            | 6.0     | 1.4   | <b>4.689 (&gt; 0.001)</b> | 0.65 |
| Vine                                        | N.A            | N.A     | N.A   | N.A                       | 0.73 |
